# Supplementary material for: Promotion of physical activity-related health competence using digital workplace-based health promotion: protocol for a controlled before-and-after study
Source: HighWire-hosted journal article supplement (doi:10.1136/bmjsem-2022-001464), 2023-01-01
Supplement: bmjsem-2022-001464supp002_data_supplement.pdf [file bmjsem-2022-001464supp002_data_supplement.pdf]

## Supplemental Material 1 – intervention exercises

| Week | First exercise per week                                        | Second exercise per week                         |                                             |
|------|----------------------------------------------------------------|--------------------------------------------------|---------------------------------------------|
| 1    | Activation for the shoulder and neck muscles with a broomstick | Sit-ups sitting on a chair                       | Hip lift sitting on a chair                 |
| 2    | Reverse butterfly sitting on a chair                           | Hamstring stretch                                | Heel raises and toe lifts                   |
| 3    | Neck circles                                                   | Stretch for the chest, shoulder and neck muscles | Wringing out the towel shoulder stretch     |
| 4    | Single-legged squat                                            | Isometric push and pull                          | Padding with a broomstick                   |
| 5    | Row sitting on a chair                                         | Neuromotor finger exercise                       | Focus on Objects Near and Far with the eyes |
